# Supplementary material
Source: publisher figshare collection journal article supplement (https://future-science-group.figshare.com/ndownloader/files/31257865)
Supplement: Supplementary file 1 [file 31257865]

**Bibliography**

[1] Engstrom AE, Cocchieri R, Driessen AH, Sjauw KD, Vis MM, Baan J *et al.* *The Impella 2.5 and 5.0 devices for ST-elevation myocardial infarction patients presenting with severe and profound cardiogenic shock: the Academic Medical Center intensive care unit experience*. Crit Care Med 2011;**39**:2072-9.

[2] Monteagudo-Vela M, Panoulas V, Fernandez-Garda R, Garcia-Saez D, Simon A. *Combined Use of Left Ventricular Assist Device, Extra Corporeal Life Support and Impella RP.* Cardiovascular revascularization medicine : including molecular interventions 2019;**20**:67-69.

[3] Ouweneel DM, de Brabander J, Karami M, Sjauw KD, Engstrom AE, Vis MM *et al.* *Real-life use of left ventricular circulatory support with Impella in cardiogenic shock after acute myocardial infarction: 12 years AMC experience*. Eur Heart J Acute Cardiovasc Care 2019;**8**:338-49.

[4] Mastroianni C, Bouabdallaoui N, Leprince P, Lebreton G. *Short-term mechanical circulatory support with the Impella 5.0 device for cardiogenic shock at La Pitie-Salpetriere*. Eur Heart J Acute Cardiovasc Care 2017;**6**:87-92.

[5] Lima B, Kale P, Gonzalez-Stawinski GV, Kuiper JJ, Carey S, Hall SA. *Effectiveness and Safety of the Impella 5.0 as a Bridge to Cardiac Transplantation or Durable Left Ventricular Assist Device*. Am J Cardiol 2016;**117**:1622-28.

[6] Griffith BP, Anderson MB, Samuels LE, Pae WE, Naka Y, Frazier OH. *The RECOVER I: a multicenter prospective study of Impella 5.0/LD for postcardiotomy circulatory support*. J Thorac Cardiovasc Surg 2013;**145**:548-54.

[7] Gaudard P, Mourad M, Eliet J, Zeroual N, Culas G, Rouviere P *et al.* *Management and outcome of patients supported with Impella 5.0 for refractory cardiogenic shock*. Crit Care 2015;**19**:363.

[8] Hall SA, Uriel N, Carey SA, Edens M, Gong G, Esposito M *et al.* *Use of a percutaneous temporary circulatory support device as a bridge to decision during acute decompensation of advanced heart failure*. J Heart Lung Transplant 2018;**37**:100-06.

[9] Chung JS, Emerson D, Ramzy D, Akhmerov A, Megna D, Esmailian F *et al.* *A new paradigm in mechanical circulatory support: 100 patient experience*. Ann Thorac Surg 2019.

[10] Schibilsky D, Kruger T, Lausberg HF, Eisenlohr C, Haller C, Nemeth A *et al.* *Impella 5.0 as a Second-Line Mechanical Circulatory Support Strategy After Extracorporeal Life Support*. Artif Organs 2016;**40**:909-16.

[11] Bansal A, Bhama JK, Patel R, Desai S, Mandras SA, Patel H *et al.* *Using the Minimally Invasive Impella 5.0 via the Right Subclavian Artery Cutdown for Acute on Chronic Decompensated Heart Failure as a Bridge to Decision*. Ochsner J 2016;**16**:210-6.

[12] Bernhardt AM, Zipfel S, Reiter B, Hakmi S, Castro L, Soffker G *et al.* *Impella 5.0 therapy as a bridge-to-decision option for patients on extracorporeal life support with unclear neurological outcomesdagger*. Eur J Cardiothorac Surg 2019.

[13] David CH, Quessard A, Mastroianni C, Hekimian G, Amour J, Leprince P *et al.* *Mechanical circulatory support with the Impella 5.0 and the Impella Left Direct pumps for postcardiotomy cardiogenic shock at La Pitié-Salpêtrière Hospital*. European journal of cardio-thoracic surgery : official journal of the European Association for Cardio-thoracic Surgery 2019.

[14] Boll G, Fischer A, Kapur NK, Salehi P. *Right Axillary Artery Conduit Is a Safe and Reliable Access for Implantation of Impella 5.0 Microaxial Pump*. Ann Vasc Surg 2019;**54**:54-59.

[15] Bertoglio L, Katsarou M, Scandroglio M, Bertoldi L, Chiesa R, Pappalardo F. *Surgical transaxillary placement of the Impella 5.0 ventricular assist device*. J Card Surg 2019;**34**:92-98.

[16] Engstrom AE, Granfeldt H, Seybold-Epting W, Dahm M, Cocchieri R, Driessen AH *et al.* *Mechanical circulatory support with the Impella 5.0 device for postcardiotomy cardiogenic shock: a three-center experience*. Minerva Cardioangiol 2013;**61**:539-46.

[17] Esposito ML, Jablonski J, Kras A, Krasney S, Kapur NK. *Maximum level of mobility with axillary deployment of the Impella 5.0 is associated with improved survival*. Int J Artif Organs 2018;**41**:236-39.

[18] Batsides G, Massaro J, Cheung A, Soltesz E, Ramzy D, Anderson MB. *Outcomes of Impella 5.0 in Cardiogenic Shock: A Systematic Review and Meta-analysis.* Innovations (Philadelphia, Pa) 2018;**13**:254-60.

[19] den Uil CA, Akin S, Jewbali LS, Dos Reis Miranda D, Brugts JJ, Constantinescu AA *et al.* *Short-term mechanical circulatory support as a bridge to durable left ventricular assist device implantation in refractory cardiogenic shock: a systematic review and meta-analysis.* European journal of cardio-thoracic surgery : official journal of the European Association for Cardio-thoracic Surgery 2017;**52**:14-25.

[20] Schultz J, Duval S, Shaffer A,Shisler D, Martin C, John R,et al. Meta-analysisof outcomes of axillary and subclavian implanted Impella 5.0 for cardiogenic shock. J Card Fail. 2019;25:S64

[21] Temporary Percutaneous Mechanical Circulatory Support with Impella Devices. Health Evidence Review Commission (HERC), 2018.

[22] Orozco-Hernandez EJ, Ahmed MI, Von Meering G, Mcelwee SK, Prejean SP, Gongora E *et al.* *Femoral venoarterial extracorporeal membrane oxygenation using a novel biatrial cannula for venous drainage and left ventricular venting.* Journal of cardiac surgery 2020.

[23] *Percutaneous Ventricular Assist Devices: A Health Technology Assessment.* Ontario health technology assessment series 2017;**17**:1-97.

[24] Bhalla A, Attaran R. *Mechanical Circulatory Support to Treat Pulmonary Embolism: Venoarterial Extracorporeal Membrane Oxygenation and Right Ventricular Assist Devices.* Texas Heart Institute journal 2020;**47**:202-06.

[25] Trpkov C, Gibson JD, Miller RJH, Grant ADM, Schnell G, Har BJ *et al.* *Percutaneous Left Ventricular Assist Device in Cardiogenic Shock: A Five-Year Single Canadian Center Initial Experience.* CJC open 2020;**2**:370-78.

[26] Abu Saleh WK, Mason P, Jabbari OA, Samir H, Bruckner BA. *Successful Use of Surgically Placed Impella 5.0 and Central Extracorporeal Membrane Oxygenation Circuit in a Patient with Postcardiotomy Shock.* Texas Heart Institute journal 2015;**42**:569-71.

[27] Alam A, Pepe R, Iyer D, Mody K, Salahuddin A, Bhatti S *et al.* *A Case of Extended Mechanical Circulatory Support with Impella 5.0 in a Patient with Cardiogenic Shock Secondary to Left Ventricular Aneurysm*. Journal of Cardiac Failure 2019;**25**:S122.

[28] Al-Darzi W, Michaels A, O'Neill W, Williams CT. *Trans-Caval Impella 5.0: A Bridge to Recovery in Peripartum Cardiomyopathy*. Journal of Cardiac Failure 2019;**25**:S147.

[29] Alkhawam H, Rafeedheen R, Abo-Salem E. *Right ventricular failure following placement of a percutaneous left ventricular assist device.* Heart & lung : the journal of critical care 2019;**48**:111-13.

[30] Arnautovic JZ, Connor-Schuler R, Ip R. *Mechanical Circulatory Support in Management of Cardiogenic Shock and Myxedema Coma.* Case reports in cardiology 2019;**2019**:2595736.

[31] Beneduce A, Bertoldi L, Calvo F, Oppizzi M, Slavich M, Spoladore R *et al.* *Percutaneous mitral valve repair with the new MitraClip XTR system in cardiogenic shock with concomitant Impella 5.0 mechanical circulatory support*. European Heart Journal: Acute Cardiovascular Care 2019;**8**:5.

[32] Bhamidipati CM, Mathur M, Hira RS, McCabe JM, Pal JD. *Impella 5.0 Fracture and Transcatheter Retrieval.* JACC Cardiovascular interventions 2016;**9**:2568-70.

[33] Burns DJP, Quantz MA. *Use of the Impella 5.0 Device as a Bridge to Recovery in Adult Fulminant Viral Myocarditis.* Innovations (Philadelphia, Pa) 2015;**10**:279-81.

[34] Castillo-Sang MA, Prasad SM, Singh J, Ewald GA, Silvestry SC. *Thirty-five day Impella 5.0 support via right axillary side graft cannulation for acute cardiogenic shock.* Innovations (Philadelphia, Pa) 2013;**8**:307-09.

[35] Cheung M, Aktuerk D, Namasivayam M, Jansz P. *Case Report: Use of Impella Mechanical Support in Transitioning From Extra-Corporeal Circuit to Left Ventricular Assist Device*. Heart Lung and Circulation 2019;**28**:S129.

[36] Choi DC, Anderson MB, Batsides GP. *Insertion of the Impella 5.0 left ventricular assist device via right anterior mini-thoracotomy: a novel practical approach.* Innovations (Philadelphia, Pa) 2011;**6**:265-66.

[37] Dalal PK, Mertens A, Shah D, Hanson I. *Hemodynamic Support Using Percutaneous Transfemoral Impella 5.0 and Impella RP for Refractory Cardiogenic Shock*. Case Rep Cardiol 2019;**2019**:4591250.

[38] Davis ME, Haglund NA, Tricarico NM, Keebler ME, Maltais S. *Development of acquired von Willebrand syndrome during short-term micro axial pump support: implications for bleeding in a patient bridged to a long-term continuous-flow left ventricular assist device.* ASAIO journal (American Society for Artificial Internal Organs : 1992) 2014;**60**:355-57.

[39] Domínguez-Pérez L, Liszkowski M, Sia YT. *Therapeutic hypothermia in cardiogenic shock post cardiac arrest supported with left ventricular assist device (Impella 5.0 LP)*. Critical Care and Shock 2014;**17**:89-91.

[40] Elmann E. *High risk left main/LAD PCI coronary stenting using left radial artery access and Impella 5.0 ld abiomed support: A case for direct aortic access*. European Heart Journal: Acute Cardiovascular Care 2018;**7**:283-84.

[41] Farris L, Nhieu S, Saatee S. *Plasma exchange and heparin use for vad placement in a patient with heparin-induced thrombocytopenia*. Critical Care Medicine 2018;**46**:49.

[42] Gazdic T, Vymetalova J, Marek T, Maly J, Maly I. *Our experience with successfully use of a percutaneous Impella 5.0 device as a bridge to recovery in fulminant lymphotic myocarditis*. European Heart Journal: Acute Cardiovascular Care 2019;**8**:206.

[43] Hansen LN, Fabrin A, Jensen MK, Schmidt H, Junker A, Møller JE. *[Mechanical circulatory support by means of a subclavian pump in a patient suffering acute heart failure].* Ugeskrift for laeger 2014;**176**.

[44] Hollander SA, Reinhartz O, Chin C, Yeh J, Maeda K, Mallidi H *et al.* *Use of the Impella 5.0 as a bridge from ECMO to implantation of the HeartMate II left ventricular assist device in a pediatric patient.* Pediatric transplantation 2012;**16**:205-06.

[45] Iskandir M, Ansari M. *THE LIFESAVING ROLE OF BIVENTRICULAR MECHANICAL SUPPORT IN A YOUNG FEMALE WITH ACUTE MYOCARDITIS*. Journal of the American College of Cardiology 2019;**73**:2955.

[46] Ivana Jurcova I, Melenovsky V, Pindak M, Riha H, Netuka I, Maly J *et al.* *Fulminant lymphocytic myocarditis with cardiogenic shock and multiorgan failure with complete recovery after percutaneous mechanical support and immunosuppression*. European Journal of Heart Failure 2019;**21**:194.

[47] Jahanyar J, Liao JM, De Valeria P, Eric Steidley D, Craner R, Ramakrishna H *et al.* *Early postoperative aortic root thrombus after heartmate 3*. Heart Surgery Forum 2019;**22**:E372-E74.

[48] Johannesen J, Alam A, Ghaly A, Huang M, Mody K, Iyer D. *FROM TAVR TO MECHANICAL VALVE TO BIOPROSTHETIC VALVE: A CASE OF TRIPLE VALVE REPLACEMENT*. Journal of the American College of Cardiology 2019;**73**:2963.

[49] Johnson DW, Erwin IJ. *Use of Impella 5.0 Prior to Transcatheter Aortic Valve Replacement in a Patient with Severe Aortic Stenosis and Cardiogenic Shock*. J Heart Valve Dis 2017;**26**:485-87.

[50] Kumpati GS, Tandar A, Patel A, Badger RS, Bull DA. *Impella 5.0 support in severe peripheral vascular disease via iliac artery approach.* Innovations (Philadelphia, Pa) 2012;**7**:379-81.

[51] Ma J, Khine H, Brambatti M, Wettersten N, Kim P, Adler E. *GERIATRIC CARE FOR GIANT CELL MYOCARDITIS: BIVENTRICULAR IMPELLA AND IMMUNOSUPPRESSION*. Journal of the American College of Cardiology 2019;**73**:2496.

[52] MacDonald V, Doherty J, Morris S. *Cardiogenic shock in a forty year old female: Could vascular genetics play a role?* Canadian Journal of Cardiology 2015;**31**:S326-S27.

[53] Mahata I, Li Z, Boulad A, Singh S, Jaiswal A, LeJemtel T *et al.* *An approach to decision making for left ventricular thrombus and infection associated with temporary mechanical circulatory support: A management challenge*. Journal of the American College of Cardiology 2016;**67**:1218.

[54] Narain S, Paparcuri G, Fuhrman TM, Silverman RB, Peruzzi WT. *Novel combination of impella and extra corporeal membrane oxygenation as a bridge to full recovery in fulminant myocarditis.* Case reports in critical care 2012;**2012**:459296.

[55] Nakamura K, Krishnan S, Mahr C, McCabe JM. *First-in-Man Percutaneous Transaxillary Artery Placement and Removal of the Impella 5.0 Mechanical Circulatory Support Device.* The Journal of invasive cardiology 2017;**29**:E53-E59.

[56] Nakamura M, Hori M, Nakagaito M, Kuwahara H, Kinoshita O, Ono M *et al.* *A case of cardiogenic shock due to acute coronary syndrome successfully recovered by percutaneous and paracorporeal left ventricular assist device*. J Artif Organs 2019;**22**:249-52.

[57] Nakao Y, Aono J, Tasaka T, Uetani T, Higashi H, Ikeda S *et al.* Impella 5.0 Mechanical Assist Device Catheter-Induced Severe Hemolysis Due to Giant Swinging Motion　- New Concern in Impella Usage. Japan, 2019.

[58] Oetken H, MacKay J, Soman D. *Use of tissue plasminogen activator via purge system in a catheter-based ventricular assist device*. Critical care medicine 2019;**47**.

[59] Ogawa S, Suzuki M, Ochi H, Saji M, Mahara K, Takamisawa I *et al.* *The Clinical Potential of Impella 5.0 Support in the Treatment of Recurrent Fulminant Viral Myocarditis with Profound Cardiogenic Shock.* Internal medicine (Tokyo, Japan) 2019;**58**:1459-62.

[60] Osswald A, Schmack B, Goldwasser R, Kreusser MM, Raake PW, Karck M *et al.* *Impella 5.0(®) as bridge-to-recovery short-term mechanical circulatory support after LVAD explantation.* Journal of thoracic disease 2019;**11**:S960-S62.

[61] Pariyadath A, Chohan HS, Abbate A, Tang D, Brath LK. *Management of thyrotoxicosis-induced cardiogenic shock with a temporary left-ventricular assist device*. American Journal of Respiratory and Critical Care Medicine 2014;**189**.

[62] Patel KM, Sherwani SS, Baudo AM, Salvacion A, Herborn J, Soong W *et al.* *Echo rounds: the use of transesophageal echocardiography for confirmation of appropriate Impella 5.0 device placement*. Anesth Analg 2012;**114**:82-5.

[63] Peltan J, Oses P, Calderon J, Casassus F, Barandon L. *Impella 5.0 microaxial pump as a right ventricular assist device after surgical treatment of posterior post-infarction ventricular septal defect.* Perfusion 2014;**29**:472-76.

[64] Poorna Pushkala Natarajan PP, Slawsky MT, Valania G, Lau EY, Hernandez-Montfort J. *Early transition to myocardial recovery in a case of cardiogenic shock and possible myocarditis*. European Journal of Heart Failure 2018;**20**:374.

[65] Rajagopalan N, Yanagida R, Hoopes CW. *Insertion of Impella 5.0 to improve candidacy for HeartMate II left ventricular assist device placement.* The Journal of invasive cardiology 2014;**26**:E40-41.

[66] Ruhparwar A, Zubarevich A, Osswald A, Raake PW, Kreusser MM, Grossekettler L *et al.* *ECPELLA 2.0—Minimally invasive biventricular groin-free full mechanical circulatory support with Impella 5.0/5.5 pump and ProtekDuo cannula as a bridge-to-bridge concept: A first-in-man method description*. Journal of Cardiac Surgery 2020;**35**:195-99.

[67] Samuels L, Gnall E, Casanova-Ghosh E. *Combined VV ECMO and impella LVAD: An alternative to VA ECMO*. Innovations: Technology and Techniques in Cardiothoracic and Vascular Surgery 2016;**11**:S19.

[68] Sayed S, Schimmer C, Shade I, Leyh R, Aleksic I. *Combined pulmonary and left ventricular support with veno-pulmonary ECMO and impella 5.0 for cardiogenic shock after coronary surgery.* Journal of cardiothoracic surgery 2017;**12**:38.

[69] Shah AS, Lee R, Hui DS, Lim MJ, Neumayr RH, Stolker JM. *Use of a Vascular Sheath in the Axillary Artery as an Alternative Access Approach for Placing an Impella 5.0 Device.* Texas Heart Institute journal 2015;**42**:385-88.

[70] Spillmann F, Van Linthout S, Klein O, Mairinger T, Potapov EV, Burkhoff D *et al.* *Mechanical unloading as a novel treatment option for chronic inflammatory cardiomyopathy-a mode of action study*. BMC Cardiovascular Disorders 2019;**19**.

[71] Thomas MP, Altman A, Magovern Jr GJ, Moraca RJ. *Insertion of an abiomed Impella® left ventricular assist device following bioprosthetic aortic valve placement*. Journal of Cardiac Surgery 2013;**28**:469-71.

[72] Vaishnav J, Latina JM, Kapoor K, Lewsey S, Schulman SP, Florido R *et al.* *Successful Bridge to Heart Transplantation with Biventricular Impella Support in a Left Ventricular Assist Device Patient*. Journal of Cardiac Failure 2019;**25**:S124.

[73] Varian K, Xu WD, Lin W, Unai S, Tong MZ, Soltesz E *et al.* *Minimally invasive biventricular mechanical circulatory support with Impella pumps as a bridge to heart transplantation: a first-in-the-world case report.* ESC heart failure 2019;**6**:552-54.

[74] White CW, Ganapathi A, Schroder J. *A Minimally Invasive Approach to HeartMate 3 Implantation for Systemic Ventricular Failure Following the Mustard Procedure for Transposition of the Great Arteries*. ASAIO J 2019.

[75] Yamamoto M, Yoneyama F, Kato H, Ieda M. *Mitral chordal rupture by Impella 5.0 in a patient with fulminant myocarditis and inflammation of mitral chordae*. Eur Heart J 2019.

[76] Yoshida S, Toda K, Miyagawa S, Yoshikawa Y, Hata H, Torikai K *et al.* *Impella 5.0 as a bridge to implantable left ventricular assist device: First clinical case in Japan*. Circulation Journal 2018;**82**:2923-24.

[77] *VESS 42nd Annual Meeting*. Annals of Vascular Surgery 2018;**48**.

[78] *Abstracts from the 3rd Annual A-CURE Symposium*. BMC Cardiovascular Disorders 2019;**19**.

[79] Afana M, Altawil M, Basir M, Alqarqaz M, Alaswad K, Eng M *et al.* *Transcaval access for the emergency delivery of mechanical circulatory support in cardiogenic shock*. BMC Cardiovascular Disorders 2019;**19**.

[80] Annamalai S, Esposito M, Qiao X, Zhang Y, Reyelt L, Boggins C *et al.* *Mobility level during acute mechanical circulatory support with axillary deployment of the impella 5.0 is associated with improved survival in advanced heart failure and shock*. Journal of Cardiovascular Translational Research 2018;**11**:69.

[81] Ansari HZ, Robinson W, Malik A. *Mechanical left ventricular support with the impella 5.0: A single center experience*. Journal of Cardiac Failure 2014;**20**:S32-S33.

[82] Araujo-Gutierrez R, Gardner J, Trachtenberg B, Bhimaraj A, Park M, Hussain I *et al.* *Safety and efficacy of mechanical circulatory support as a bridge to heart-kidney transplant*. Journal of Heart and Lung Transplantation 2018;**37**:S426-S27.

[83] Bansal A, Bhama JK, Patel H, Desai S, Mandras S, Ahmad U *et al.* *Bridge-to-decision LVAD support using the impella 5.0 via a right subclavian artery approach*. Journal of Heart and Lung Transplantation 2013;**32**:S281.

[84] Bhimaraj A. *Axillary impella 5.0 as a bridge to durable LVAD*. Journal of Cardiovascular Translational Research 2018;**11**:69.

[85] Boll G, Fischer A, Kapur N, Salehi P. *Axillary artery conduit is a safe and reliable access for implantation of impella 5.0 microaxial pump*. Annals of Vascular Surgery 2018;**48**:3-4.

[86] Bonnefoy-Cudraz E, Huot L, Elbaz M, Cottin Y, Roux A, Bouchot O *et al.* *Mechanical circulatory support with the Impella 5.0 and intra-aortic balloon pump for cardiogenic shock in acute myocardial infarction. The IMPELLA-STIC study*. European Heart Journal 2014;**35**:1063.

[87] Castro L, Zipfel S, Hakmi S, Reiter B, Soffker G, Lubos E *et al.* *Impella 5.0 therapy decreases bleeding complications in patients after change from extracorporeal life support*. Thoracic and Cardiovascular Surgeon 2019;**67**.

[88] Cecere R, Samoukovic G, Esfandiari S, McGregor M. *The impella microaxial left ventricular assist device: Outcomes and cost-effectiveness compared with alternative treatment*. Interactive Cardiovascular and Thoracic Surgery 2010;**10**:S174.

[89] Chagarlamudi A, Adusumalli S, Patwardhan M, Daggubati R. *Is impella 2.5 support enough in acute myocardial infarction with cardiogenic shock? - The escalation conjecture*. Catheterization and Cardiovascular Interventions 2013;**81**:S20.

[90] Cheng R, Ramzy D, Azarbal B, Esmailian F, Geft D, Chang DH *et al.* *Clinical outcomes of impella microaxillary pumps when used in patients with cardiogenic shock bridged successfully to durable mechanical circulatory support and cardiac transplantation*. Journal of Heart and Lung Transplantation 2017;**36**:S139.

[91] Cheung A, Danter M, Gregory D. *Comparative economic outcomes in cardiogenic shock patients managed with the minimally invasive impella or extracorporeal life support*. Journal of the American College of Cardiology 2012;**60**:B110.

[92] Doersch KM, Tong CW, Sareyyupoglu B. *Impella 5.0 through an axillary access is a promising approach to improve outcomes in decompensated heart failure patients to receive long-term mechanical circulatory assistance*. Journal of Heart and Lung Transplantation 2014;**33**:S61.

[93] Emmanuel S, Watson A, Jansz P, Dhital K, Connellan M, Granger E. *Initial Experience With the Impella Left Ventricular Assist Device*. Heart Lung and Circulation 2019;**28**:S128-S29.

[94] Engstrom AE, Cocchieri R, Driessen AH, Sjauw KD, Vis MM, Baan J *et al.* *The Impella devices for patients in profound cardiogenic shock; the AMC ICU experience*. Journal of the American College of Cardiology 2010;**56**:B106.

[95] Esposito M, O'Kelly R, Aghili N, Annamalai S, Hamadeh A, Kiernan M *et al.* *Circulating biomarkers of hemolysis are not significantly increased among patients supported with micro-axial flow catheters*. Journal of Heart and Lung Transplantation 2016;**35**:S263-S64.

[96] Esposito ML, Annamalai S, O'Kelly R, Zisa D, Kuchibhotla S, Pham DT *et al.* *Defining hemodynamic profiles and outcomes associated with cardiogenic shock and acute mechanical circulatory support*. Journal of Cardiac Failure 2016;**22**:S121.

[97] Farahmand P, Quessard A, Lebreton G, D'Alessandro C, Mastroianni C, Leprince P. *Outcome of the impella device for mechanical circulatory support in patients with refractory cardiogenic shock*. Journal of Heart and Lung Transplantation 2015;**34**:S84.

[98] Gaudard P, Mourad M, Eliet J, Zeroual N, Culas G, Rouvière P *et al.* *Management and outcome of patients supported with Impella 5.0 for refractory cardiogenic shock.* Critical care (London, England) 2015;**19**:363.

[99] Goulet C, Joyce D, Mohammed A, Joyce L. *Single Center Experience in the Management of Cardiogenic Shock Using Temporary Mechanical Circulatory Support Devices - Impella CP, Impella 5.0, IABP, and ECMO*. Journal of Heart and Lung Transplantation 2019;**38**:S437.

[100] Hall S, Kuiper J, Grimsley B, Pearl G, Matter G, Hamman B *et al.* *The use of impellas 5.0/LD in the management of heart failure patients with cardiogenic shock: A multidisciplinary team approach*. Journal of Cardiac Failure 2012;**18**:S47.

[101] Hall S, Uriel N, Carey S, Edens M, Esposito M, O'Kelly R *et al.* *Use of the Impella 5.0 circulatory support device for bridge to decision during acute decompensation of advanced heart failure*. Journal of the American College of Cardiology 2016;**68**:B49.

[102] Hall SA, Carey S, Edens M, Gong G, Esposito M, O'Kelly R *et al.* *Use of Impella 5.0 ventricular assist device as a bridge to decision during acute decompensation of end-stage chronic heart failure*. Journal of Heart and Lung Transplantation 2016;**35**:S54-S55.

[103] Hall SA, Lima B, Kale P, Kuiper JJ, Carey S, Shafii AE *et al.* *Impella 5.0 as a bridge to cardiac transplantation or durable left ventricular assist device*. Journal of Heart and Lung Transplantation 2015;**34**:S231.

[104] Ibarra-Cortez SH, Araujo-Gutierrez R, Cruz-Solbes AS, Bruckner B, Estep JD, Suarez EE *et al.* *Single center experience of long term outcomes of severe cardiogenic shock patients needing impella 5.0 placement*. Journal of Heart and Lung Transplantation 2017;**36**:S432.

[105] Itoh A, Pisani M, Baltalzar M, Balsara KR, Masood MF, Tepper S *et al.* *Clinical benefits and complications in patients with percutaneous VAD versus surgical LV vent with ECLS: multicenter registry for cardiogenic shock-Utilization and efficacy of device therapy (rescue)*. Journal of Heart and Lung Transplantation 2017;**36**:S439‐.

[106] Jablonski J, Kras A, Krasney SJ, Kapur N, Michele E, Annamalai S *et al.* *Mobility level as an indicator of survival for patients requiring acute mechanical circulatory support via axillary impella 5.0*. Cardiopulmonary Physical Therapy Journal 2018;**29**:32-33.

[107] Kawabori M, Pramil V, Shindgikar P, Zhan Y, Warner KG, Rastegar H *et al.* *Distal Embolic Protection in Impella 5.0 Explantation: "Loop & Snare" Technique*. Ann Thorac Surg 2019.

[108] Lebreton G, Mastroianni C, Quessard A, Leprince P. *Impella 5.0: Effective short-term support in acute refractory cardiogenic shock of various etiologies*. Journal of Heart and Lung Transplantation 2015;**34**:S213.

[109] Lee AY, Guerrero-Miranda CY, Nisar T, Jamil AK, Perez A, Tangellamundi D *et al.* *Comparison of Percutaneous Ventricular Assist Device and Intra-Aortic Balloon Pump for Cardiogenic Shock*. Journal of Heart and Lung Transplantation 2019;**38**:S63.

[110] Lemaire A, Batsides G, Prendergast T, Scholz P, Spotnitz A, Lozano AM *et al.* *The use of the impella device in patients with postcardiotomy cardiogenic shock*. Journal of Heart and Lung Transplantation 2013;**32**:S283.

[111] Lemaire A, Batsides G, Prendergast T, Stockmaster N, Medjamia A, Lozane AM *et al.* *Outcome of the impella device for acute mechanical circulatory support*. Innovations: Technology and Techniques in Cardiothoracic and Vascular Surgery 2012;**7**:115.

[112] Lemaire A, Lee LY, Ghaly A, Spotnitz A, Batsides G. *The impella device offers superior survival in acute cardiogenic shock*. Journal of Heart and Lung Transplantation 2014;**33**:S251.

[113] Maini B, Moses J, Dixon S, Anderson M, Lombardi W, Eifer Moller J *et al.* *Global cVAD registry: a global initiative in percutaneous circulatory support From the cVAD steering committee on behalf of all cVAD investigators*. Journal of the american college of cardiology Conference: 28th annual symposium transcatheter cardiovascular therapeutics, TCT 2016 United states Conference start: 20161029 Conference end: 20161102 2016;**68**:B10.

[114] McCabe J, Khaki A, Nicholson W, Blank N, Grantham JA, Lombardi W *et al.* *Safety and efficacy of percutaneous axillary artery access for mechanical circulatory support with the impella© devices: An initial evaluation from the axillary access registry to monitor safety (ARMS) multicenter registry*. Journal of the American College of Cardiology 2017;**70**:B43.

[115] Napp LC, Moeller JE, Ibrahim K, Uwarow A, Sieweke JT, O'Neill W *et al.* *First series of Impella mechanical circulatory support for takotsubo syndrome with shock*. European Heart Journal 2018;**39**:1200-01.

[116] Nelson D, Mohammed A, Joyce D. *Prolonged impella 5.0 support is safe and used as a bridge to clinical decision making*. BMC Cardiovascular Disorders 2019;**19**.

[117] Nelson D, Mohammed A, Klein E. *Impella 5.0 as a Bridge to Clinical Decision Making*. Journal of Heart and Lung Transplantation 2019;**38**:S437.

[118] Nguyen HL, Taimeh Z, Simpson L, George J, Ynalvez LA, Sudhakar D *et al.* *Durability of the Impella 5.0 Micro-Axial Flow Device as a Bridge to Long Term Therapy in Patients with Refractory Cardiogenic Shock*. Journal of Cardiac Failure 2019;**25**:S167.

[119] Nicholson C. *Early mobilization of patients with axillary impella 5.0*. Cardiopulmonary Physical Therapy Journal 2017;**28**:43.

[120] Okoh A, Thawabi M, Al Obaidi N, Fugar S, Singh S, Gold J *et al.* *TCT-336 Use of a Percutaneous Temporary Mechanical Circulatory Support as a Bridge to Decision in Advanced Heart Failure Patients Listed for Heart Transplantation*. Journal of the American College of Cardiology 2019;**74**:B333.

[121] Oses P, Casassus F, Leroux L, Calderon J, Barandon L. *Optimization of Impella 5.0 implantation using mini-sternotomy approach in postmyocardial infarction cardiogenic shock*. J Card Surg 2012;**27**:605-6.

[122] Ouweneel DM, De Brabander J, Sjauw KD, Engstom AE, Vis MM, Wykrzykowska JJ *et al.* *Twelve year experiences with left ventricular circulatory support with Impella*. European Heart Journal 2017;**38**:603.

[123] Pappalardo F, Bertoldi L, Reichenspurner H, Bernhardt A. *Left ventricular assist devise implantation after extracorporeal membrane oxygenation therapy and subsequent impella 5.0 therapy-a multicenter analysis*. Thoracic and Cardiovascular Surgeon 2019;**67**.

[124] Richet S. *Cardiogenic shock and Impella 5.0*. Archives of Cardiovascular Diseases Supplements 2016;**8**:110.

[125] Sudhakar D, Nguyen HL, Simpson L, George JK, Nair A, Oberton S *et al.* *Micro-axial flow device (Impella 5.0) use in refractory cardiogenic shock-single center experience*. Catheterization and Cardiovascular Interventions 2019;**93**:S107-S08.

[126] Taimeh Z, Simpson L, George J, Ynalvez LA, Sudhakar D, Nguyen HL *et al.* *Use of the Impella 5.0 Micro-Axial Flow Device in Refractory Cardiogenic Shock - A Single Center Experience*. Journal of Cardiac Failure 2019;**25**:S175-S76.

[127] Tank R, Cheng R, Ramzy D, Esmailian F, Kobashigawa J, Moriguchi J *et al.* *Comparative clinical outcomes with the initial use of impella CP versus impella 5.0 devices in patients with severe cardiogenic shock*. Journal of the American College of Cardiology 2017;**70**:B227-B28.

[128] Tepper S, Garcia MB, Pisani M, Ewald G, Singh J, Masood MF *et al.* *Left ventricular unloading with percutaneous ventricular assist device is comparable to direct left ventricular vent during extracorporeal life support*. Circulation 2016;**134**.

[129] Wolfson AM, Cole RM, Emerson D, Moriguchi J, Chung JS, Ramzy D. *Hemodynamic Evaluation of Right Ventricular Function before and after Impella 5.0 Placement for Cardiogenic Shock*. Journal of Heart and Lung Transplantation 2019;**38**:S228.

[130] Yanagida R, Rajagopalan N, Hoopes C. *Mechanical circulatory support for patients with acute cardiogenic shock*. Transplantation 2014;**98**:422.

[131] Zern EK, Rottkamp AW, Holmlund H, Mora SS, Sharma S, Roy N *et al.* *Mechanical unloading characteristics of the impella 5.0 axillary pump using a hemodynamic-echocardiographic ramp protocol*. Journal of Heart and Lung Transplantation 2018;**37**:S276-S77.

[132] Zipfel S, Hakmi S, Reiter B, Barten MJ, Rybczinski M, Kubik M *et al.* *Impella 5.0 as a bridge-to bridge option after extracorporeal life support. Lessons learned from the first 15 cases*. Journal of Heart and Lung Transplantation 2018;**37**:S376.

[133] Zipfel S, Reiter B, Yildirim Y, Hakmi S, Barten M, Rybczinski M *et al.* *Secondary LV unloading after out-of-hospital ECLS implantation and transportation improved survival and probability of successful weaning*. Thoracic and Cardiovascular Surgeon 2018;**66**.
